# Supplementary material for: BaCdSnS4and Ba3CdSn2S8: syntheses, structures, and non-linear optical and photoluminescence properties
Source: Royal Society of Chemistry journal article supplement (doi:10.1039/c6dt01537a), 2016-01-01

## Supporting Information

### **BaCdSnS<sub>4</sub> and Ba<sub>3</sub>CdSn<sub>2</sub>S<sub>8</sub>: Syntheses, Structures, Nonlinear Optical and Photoluminescence Properties**

Ni Zhen,<sup>a,b</sup> Kui Wu,<sup>a\*</sup> Ying Wang,<sup>a</sup> Qiang Li,<sup>b</sup> Wenhui Gao,<sup>a</sup> Dianwei  
Hou,<sup>a</sup> Zhihua Yang,<sup>a</sup> Shilie Pan,<sup>a\*</sup>

*<sup>a</sup>Key Laboratory of Functional Materials and Devices for Special Environments;  
Xinjiang Technical Institute of Physics & Chemistry, Chinese Academy of Sciences;  
Xinjiang Key Laboratory of Electronic Information Materials and Devices, 40-1  
South Beijing Road, Urumqi 830011, China.*

*<sup>b</sup>School of Physics Science and Technology, Xinjiang University, Urumqi, Xinjiang  
830046, China.*

To whom correspondence should be addressed.

E-mail: [slpan@ms.xjb.ac.cn](mailto:slpan@ms.xjb.ac.cn) (Shilie Pan)

Table S1. (a) Atomic coordinates ( $\times 10^{-4}$ ) and equivalent isotropic displacement parameters ( $\text{\AA}^2 \times 10^3$ ) for BaCdSnS<sub>4</sub>.  $U_{\text{eq}}$  is defined as one-third of the trace of the orthogonalized  $U_{ij}$  tensor.

| Atom  | X       | Y        | Z        | $U_{\text{eq}}$ | BVS   | Wyckoff position |
|-------|---------|----------|----------|-----------------|-------|------------------|
| Ba(1) | 10000   | 10000    | 135(2)   | 15(1)           | 2.215 | 8a               |
| Ba(2) | 9990(1) | 7477(1)  | 113(2)   | 14(1)           | 2.187 | 16b              |
| Ba(3) | 10000   | 10000    | 5097(2)  | 16(1)           | 2.189 | 8a               |
| Cd(1) | 8884(1) | 8757(1)  | 2586(1)  | 22(1)           | 2.040 | 16b              |
| Cd(2) | 9249(1) | 8749(1)  | 7286(1)  | 22(1)           | 2.030 | 16b              |
| Sn(1) | 8182(1) | 8752(1)  | 5486(1)  | 13(1)           | 4.144 | 16b              |
| Sn(2) | 8621(1) | 8746(1)  | 86(1)    | 13(1)           | 4.149 | 16b              |
| S(1)  | 2070(5) | -2599(9) | 6455(4)  | 7(1)            | 2.138 | 16b              |
| S(2)  | 6024(4) | 2715(7)  | 5585(3)  | 8(1)            | 2.252 | 16b              |
| S(3)  | 9564(2) | 8745(3)  | -913(3)  | 14(1)           | 2.231 | 16b              |
| S(4)  | 7820(2) | 8736(3)  | -1132(3) | 17(1)           | 2.145 | 16b              |
| S(5)  | 8710(3) | 7894(2)  | 6215(4)  | 17(1)           | 1.990 | 16b              |
| S(6)  | 8715(3) | 9601(2)  | 6242(4)  | 14(1)           | 2.024 | 16b              |
| S(7)  | 8694(3) | 9602(2)  | 1222(4)  | 13(1)           | 1.965 | 16b              |
| S(8)  | 8694(3) | 7905(2)  | 1244(4)  | 16(1)           | 2.006 | 16b              |

Table S1. (b) Atomic coordinates ( $\times 10^{-4}$ ) and equivalent isotropic displacement parameters ( $\text{\AA}^2 \times 10^3$ ) for  $\text{Ba}_3\text{CdSn}_2\text{S}_8$ .  $U_{\text{eq}}$  is defined as one-third of the trace of the orthogonalized  $U_{ij}$  tensor.

| <b>Atom</b> | <b>X</b> | <b>Y</b> | <b>Z</b> | <b><math>U_{\text{eq}}</math></b> | <b>BVS</b> | <b>Wyckoff position</b> |
|-------------|----------|----------|----------|-----------------------------------|------------|-------------------------|
| Ba(1)       | 10000    | 7500     | -177(1)  | 36(1)                             | 2.13       | 24d                     |
| Cd(1)       | 10000    | 2500     | -1250    | 26(1)                             | 1.97       | 12b                     |
| Sn(1)       | 9785(1)  | 4785(1)  | 215(1)   | 17(1)                             | 4.18       | 16c                     |
| S(1)        | 10850(1) | 3910(1)  | -662(1)  | 20(1)                             | 2.19       | 48e                     |
| S(2)        | 8865(1)  | 3865(1)  | 1135(1)  | 28(1)                             | 2.29       | 16c                     |

Table S2. (a) Selected bond distances (Å) and angles (deg) for BaCdSnS<sub>4</sub>.

|                     |            |                      |            |
|---------------------|------------|----------------------|------------|
| Cd(1)-S(2)          | 2.453(4)   | S(2)-Cd(1)-S(7)      | 126.19(19) |
| Cd(1)-S(8)          | 2.588(5)   | S(8)-Cd(1)-S(7)      | 90.83(11)  |
| Cd(1)-S(1)          | 2.596(4)   | S(1)-Cd(1)-S(7)      | 105.77(18) |
| Cd(1)-S(7)          | 2.597(5)   | S(8)-Sn(2)-S(3)      | 106.84(19) |
| Cd(2)-S(3)          | 2.456(4)   | S(7)-Sn(2)-S(3)      | 106.39(18) |
| Cd(2)-S(6)          | 2.577(6)   | S(1)-Sn(1)-S(5)      | 121.0(2)   |
| Cd(2)-S(4)          | 2.604(4)   | S(1)-Sn(1)-S(6)      | 120.9(2)   |
| Cd(2)-S(5)          | 2.604(6)   | S(5)-Sn(1)-S(6)      | 102.06(13) |
| Sn(1)-S(1)          | 2.356(4)   | S(1)-Sn(1)-S(2)#2    | 104.65(13) |
| Sn(1)-S(5)          | 2.387(5)   | S(5)-Sn(1)-S(2)#2    | 102.4(2)   |
| Sn(1)-S(6)          | 2.390(5)   | S(6)-Sn(1)-S(2)#2    | 102.99(18) |
| Sn(1)-S(2)          | 2.413(4)   | S(4)-Sn(2)-S(8)      | 118.3(2)   |
| Sn(2)-S(4)          | 2.353(4)   | S(4)-Sn(2)-S(7)      | 118.5(2)   |
| Sn(2)-S(8)          | 2.381(5)   | S(8)-Sn(2)-S(7)      | 101.37(12) |
| Sn(2)-S(7)          | 2.392(5)   | S(4)-Sn(2)-S(3)      | 104.45(14) |
| Sn(2)-S(3)          | 2.419(4)   | S(7)#12-Ba(1)-S(8)#5 | 68.73(16)  |
| Ba(1)-S(1)          | 3.234(7)   | S(3)-Ba(1)-S(3)#12   | 129.12(16) |
| Ba(2)-S(1)          | 3.246(6)   | S(3)-Ba(1)-S(1)#5    | 63.11(10)  |
| Ba(2)-S(2)          | 3.202(6)   | S(3)#12-Ba(1)-S(1)#5 | 147.05(7)  |
| Ba(3)-S(2)          | 3.202(6)   | S(3)-Ba(1)-S(1)#9    | 147.05(7)  |
| Ba(1)-S(3)          | 3.199(6)   | S(3)#12-Ba(1)-S(1)#9 | 63.11(10)  |
| Ba(2)-S(3)          | 3.205(6)   | S(1)#5-Ba(1)-S(1)#9  | 126.47(18) |
| Ba(2)-S(4) #9       | 3.232(7)   | S(3)-Ba(1)-S(7)#12   | 131.75(11) |
| Ba(2)-S(4)#1        | 3.232(6)   | S(3)#12-Ba(1)-S(7)   | 73.04(11)  |
| Ba(3)-S(4)          | 3.238(6)   | S(1)#5-Ba(1)-S(7)    | 78.11(13)  |
| Ba(2)-S(5)          | 3.255(6)   | S(1)#9-Ba(1)-S(7)    | 79.27(12)  |
| Ba(3)-S(5)          | 3.291(6)   | S(3)-Ba(1)-S(7)      | 73.04(11)  |
| Ba(2)-S(6)          | 3.263(6)   | S(3)#12-Ba(1)-S(7)   | 131.75(11) |
| Ba(3)-S(6)          | 3.270(6)   | S(1)#5-Ba(1)-S(7)    | 79.27(12)  |
| Ba(1)-S(7)          | 3.273(6)   | S(1)#9-Ba(1)-S(7)    | 78.11(13)  |
| Ba(2)-S(7)          | 3.302(6)   | S(7)#12-Ba(1)-S(7)   | 128.4(2)   |
| Ba(1)-S(8)          | 3.276(6)   | S(3)-Ba(1)-S(8)#9    | 76.09(12)  |
| Ba(2)-S(8)          | 3.300(6)   | S(3)#12-Ba(1)-S(8)#9 | 76.24(12)  |
| S(3)#3-Cd(2)-S(6)   | 129.53(19) | S(1)#5-Ba(1)-S(8)#9  | 133.94(12) |
| S(3)#3-Cd(2)-S(4)#4 | 101.52(11) | S(1)#9-Ba(1)-S(8)#9  | 78.89(11)  |
| S(6)-Cd(2)-S(4)#4   | 98.17(18)  | S(7)#12-Ba(1)-S(8)#9 | 147.94(8)  |
| S(3)#3-Cd(2)-S(5)   | 129.73(19) | S(7)-Ba(1)-S(8)#9    | 68.73(16)  |
| S(6)-Cd(2)-S(5)     | 91.57(11)  | S(3)-Ba(1)-S(8)#5    | 76.24(12)  |
| S(4)#4-Cd(2)-S(5)   | 98.94(19)  | S(3)#12-Ba(1)-S(8)#5 | 76.09(12)  |
| S(2)-Cd(1)-S(8)     | 125.82(19) | S(1)#5-Ba(1)-S(8)#5  | 78.89(11)  |
| S(2)-Cd(1)-S(1)     | 100.28(13) | S(1)#9-Ba(1)-S(8)#5  | 133.94(12) |
| S(8)-Cd(1)-S(1)     | 105.85(19) | S(8)-Ba(2)-S(7)#5    | 146.73(8)  |

|                       |            |                       |            |
|-----------------------|------------|-----------------------|------------|
| S(7)-Ba(1)-S(8)#5     | 147.94(8)  | S(2)-Ba(3)-S(2)#12    | 120.32(18) |
| S(8)#9-Ba(1)-S(8)#5   | 112.4(2)   | S(2)-Ba(3)-S(4)#4     | 66.24(11)  |
| S(3)-Ba(2)-S(1)#5     | 62.91(10)  | S(2)#12-Ba(3)-S(4)#4  | 156.19(7)  |
| S(4)#1-Ba(2)-S(1)#5   | 122.01(15) | S(2)-Ba(3)-S(4)#11    | 156.19(7)  |
| S(2)#13-Ba(2)-S(5)#13 | 80.72(11)  | S(2)#12-Ba(3)-S(4)#11 | 66.24(11)  |
| S(2)#13-Ba(2)-S(3)    | 124.74(14) | S(4)#4-Ba(3)-S(4)#11  | 118.06(19) |
| S(2)#13-Ba(2)-S(4)#1  | 66.32(11)  | S(2)-Ba(3)-S(6)#12    | 128.41(12) |
| S(3)-Ba(2)-S(4)#1     | 150.88(12) | S(2)#12-Ba(3)-S(6)#12 | 80.54(11)  |
| S(2)#13-Ba(2)-S(1)#5  | 151.88(10) | S(4)#4-Ba(3)-S(6)#12  | 78.67(13)  |
| S(3)-Ba(2)-S(5)#13    | 130.32(12) | S(4)#11-Ba(3)-S(6)#12 | 73.97(12)  |
| S(4)#1-Ba(2)-S(5)#13  | 75.22(12)  | S(2)-Ba(3)-S(6)       | 80.54(11)  |
| S(1)#5-Ba(2)-S(5)#13  | 76.52(13)  | S(2)#12-Ba(3)-S(6)    | 128.41(12) |
| S(2)#13-Ba(2)-S(6)#10 | 71.09(11)  | S(4)#4-Ba(3)-S(6)     | 73.97(12)  |
| S(3)-Ba(2)-S(6)#10    | 75.88(12)  | S(4)#11-Ba(3)-S(6)    | 78.67(13)  |
| S(4)#1-Ba(2)-S(6)#10  | 84.62(12)  | S(6)#12-Ba(3)-S(6)    | 125.3(2)   |
| S(1)#5-Ba(2)-S(6)#10  | 133.23(12) | S(2)-Ba(3)-S(5)#9     | 77.79(12)  |
| S(5)#13-Ba(2)-S(6)#10 | 150.22(8)  | S(2)#12-Ba(3)-S(5)#9  | 70.35(12)  |
| S(2)#13-Ba(2)-S(8)    | 129.64(12) | S(4)#4-Ba(3)-S(5)#9   | 131.97(12) |
| S(3)-Ba(2)-S(8)       | 72.66(11)  | S(4)#11-Ba(3)-S(5)#9  | 84.13(11)  |
| S(4)#1-Ba(2)-S(8)     | 80.32(13)  | S(6)#12-Ba(3)-S(5)#9  | 148.86(8)  |
| S(1)#5-Ba(2)-S(8)     | 77.95(11)  | S(6)-Ba(3)-S(5)#9     | 69.49(16)  |
| S(5)#13-Ba(2)-S(8)    | 126.88(18) | S(2)-Ba(3)-S(5)#5     | 70.35(12)  |
| S(6)#10-Ba(2)-S(8)    | 69.12(17)  | S(2)#12-Ba(3)-S(5)#5  | 77.79(12)  |
| S(2)#13-Ba(2)-S(7)#5  | 78.04(12)  | S(4)#4-Ba(3)-S(5)#5   | 84.13(11)  |
| S(3)-Ba(2)-S(7)#5     | 75.83(11)  | S(4)#11-Ba(3)-S(5)#5  | 131.97(12) |
| S(4)#1-Ba(2)-S(7)#5   | 132.50(12) | S(6)#12-Ba(3)-S(5)#5  | 69.49(16)  |
| S(1)#5-Ba(2)-S(7)#5   | 78.45(11)  | S(6)-Ba(3)-S(5)#5     | 148.86(8)  |
| S(5)#13-Ba(2)-S(7)#5  | 68.71(17)  | S(5)#9-Ba(3)-S(5)#5   | 113.2(2)   |
| S(6)#10-Ba(2)-S(7)#5  | 113.05(17) |                       |            |

Note. Symmetry transformations used to generate equivalent atoms:

#1  $-x+7/4, y-1/4, z+1/4$     #2  $x-1/4, -y+7/4, z+1/4$  #3  $x, y, z+1$

#4  $x+1/4, -y+7/4, z+3/4$     #5  $x+1/4, -y+7/4, z-1/4$

#6  $-x+2, -y+3/2, z+1/2$     #7  $x, y, z-1$     #8  $x-1/4, -y+7/4, z-3/4$

#9  $-x+7/4, y+1/4, z-1/4$     #10  $-x+7/4, y-1/4, z-3/4$

#11  $-x+7/4, y+1/4, z+3/4$     #12  $-x+2, -y+2, z$

#13  $-x+2, -y+3/2, z-1/2$

Table S2. (b) Selected bond distances (Å) and angles (deg) for Ba<sub>3</sub>CdSn<sub>2</sub>S<sub>8</sub>.

|                       |            |                     |           |
|-----------------------|------------|---------------------|-----------|
| Cd(1)-S(1)            | 2.5654(18) | S(2)#4-Ba(1)-S(2)#5 | 112.43(5) |
| Cd(1)-S(1)#12         | 2.5654(18) | S(2)#4-Ba(1)-S(1)#6 | 74.17(5)  |
| Cd(1)-S(1)#13         | 2.5654(18) | S(2)#5-Ba(1)-S(1)#6 | 156.66(5) |
| Cd(1)-S(1)#14         | 2.5654(18) | S(2)#4-Ba(1)-S(1)#1 | 156.66(5) |
| Sn(1)-S(2)            | 2.340(3)   | S(2)#5-Ba(1)-S(1)#1 | 74.17(5)  |
| Sn(1)-S(1)#1          | 2.3977(18) | S(1)#6-Ba(1)-S(1)#1 | 109.04(7) |
| Sn(1)-S(1)#2          | 2.3977(18) | S(2)#4-Ba(1)-S(1)#2 | 87.60(6)  |
| Sn(1)-S(1)            | 2.3977(18) | S(2)#5-Ba(1)-S(1)#2 | 73.03(5)  |
| Ba(1)-S(2)#4          | 3.1352(14) | S(1)#6-Ba(1)-S(1)#2 | 130.29(5) |
| Ba(1)-S(2)#5          | 3.1352(14) | S(1)#1-Ba(1)-S(1)#2 | 72.64(6)  |
| Ba(1)-S(1)#6          | 3.2057(19) | S(2)#4-Ba(1)-S(1)#7 | 73.03(5)  |
| Ba(1)-S(1)#1          | 3.2057(19) | S(2)#5-Ba(1)-S(1)#7 | 87.60(6)  |
| Ba(1)-S(1)#2          | 3.2885(19) | S(1)#6-Ba(1)-S(1)#7 | 72.64(6)  |
| Ba(1)-S(1)#7          | 3.2885(19) | S(1)#1-Ba(1)-S(1)#7 | 130.29(5) |
| Ba(1)-S(1)#8          | 3.499(2)   | S(1)#2-Ba(1)-S(1)#7 | 145.07(6) |
| Ba(1)-S(1)#9          | 3.499(2)   | S(2)#4-Ba(1)-S(1)#8 | 131.69(6) |
| S(2)-Sn(1)-S(1)#1     | 112.12(4)  | S(2)#5-Ba(1)-S(1)#8 | 94.32(3)  |
| S(2)-Sn(1)-S(1)#2     | 112.12(4)  | S(1)#6-Ba(1)-S(1)#8 | 67.27(2)  |
| S(1)#1-Sn(1)-S(1)#2   | 106.70(5)  | S(1)#1-Ba(1)-S(1)#8 | 67.27(2)  |
| S(2)-Sn(1)-S(1)       | 112.12(4)  | S(1)#2-Ba(1)-S(1)#8 | 139.89(5) |
| S(1)#1-Sn(1)-S(1)     | 106.70(5)  | S(1)#7-Ba(1)-S(1)#8 | 68.58(5)  |
| S(1)#2-Sn(1)-S(1)     | 106.70(5)  | S(2)#4-Ba(1)-S(1)#9 | 94.32(3)  |
| S(1)-Cd(1)-S(1)#12    | 96.50(2)   | S(2)#5-Ba(1)-S(1)#9 | 131.69(6) |
| S(1)-Cd(1)-S(1)#13    | 140.69(8)  | S(1)#6-Ba(1)-S(1)#9 | 67.27(2)  |
| S(1)#12-Cd(1)-S(1)#13 | 96.50(2)   | S(1)#1-Ba(1)-S(1)#9 | 67.27(2)  |
| S(1)-Cd(1)-S(1)#14    | 96.50(2)   | S(1)#2-Ba(1)-S(1)#9 | 68.58(5)  |
| S(1)#12-Cd(1)-S(1)#14 | 140.69(8)  | S(1)#7-Ba(1)-S(1)#9 | 139.89(5) |
| S(1)#13-Cd(1)-S(1)#14 | 96.50(2)   | S(1)#8-Ba(1)-S(1)#9 | 96.52(6)  |

Note. Symmetry transformations used to generate equivalent atoms:

#1 -z+1, x-1/2, -y+1/2 #2 y+1/2, -z+1/2, -x+1 #3 -z+1, -x+3/2, y-1 #4 -y+5/4, -

x+7/4, z-1/4 #5 y+3/4, x-1/4, z-1/4 #6 z+1, -x+2, -y+1/2

#7 -y+3/2, z+1, -x+1 #8 -x+9/4, -z+3/4, y-1/4 #9 x-1/4, z+3/4, y-1/4

#10 -x+2, -y+3/2, z+0 #11 y+1, z+1, x-1 #12 -y+5/4, x-3/4, -z-1/4

#13 -x+2, -y+1/2, z+0 #14 y+3/4, -x+5/4, -z-1/4 #15 z+1, x-1, y-1 #16

#x+1/4, z+1/4, y-3/4 #17 -x+7/4, -z+1/4, y-3/4

#18  $-z+3/4, y-1/4, -x+5/4$  #19  $y+1/4, x-3/4, z+1/4$

Table S3. Space groups of compounds following the formula of  $A_2MNS_4$

(A = alkali metal, M=Cd and N=Sn).

| quaternary                 |                    | ternary                |                   |
|----------------------------|--------------------|------------------------|-------------------|
| compounds                  | space group        | compounds              | space group       |
| $Li_2CdSnS_4$ <sup>1</sup> | $Pmn2_1$ -NCS      | $LiInS_2$ <sup>2</sup> | $Pna2_1$ -NCS     |
| $Na_2CdSnS_4$ <sup>3</sup> | C2-NCS             | $NaInS_2$ <sup>4</sup> | $R\bar{3}m$ -CS   |
| $Ag_2CdSnS_4$ <sup>5</sup> | $Cmc2_1$ -NCS      | $AgInS_2$ <sup>6</sup> | $I\bar{4}2d$ -NCS |
| $Cu_2CdSnS_4$ <sup>7</sup> | $I\bar{4}2m$ - NCS | $CuInS_2$ <sup>8</sup> | $I\bar{4}2d$ -NCS |

## References

1. J. W. Lekse, M. A. Moreau, K. L. McNerny, J. Yeon, P. S. Halasyamani, and J. A. Aitken, *Inorg. Chem.* 2009, 48, 7516.
2. L. Isaenko, I. Vasilyeva, A. Merkulov, A. Yelisseyev, and S. Lobanov, *J. Cryst. Growth* 2005, 275, 217.
3. M. S. Devi, and K. Vidyasagar, *J. Chem. Soc., Dalton Trans.* 2002, 9, 2092.
4. R. Hoppe, W. Lidecke, and F. C. Frorath, *Z. anorg. allg. Chem.* 1961, 309, 49.
5. O. V. Parasyuk, I. D. Olekseyuk, L.V. Piskach, S. V. Volkov, and V. I. Pekhnyo, *J. Alloy Compd.* 2005, 399, 173.
6. G. Delgado, A. J. Mora, C. Pineda, and T. Tinoco, *Mater. Res. Bull.* 2001, 36, 2507.
7. K. A. Rosmus, J. A. Brant, S. D. Wisneski, D. J. Clark, Y. S. Kim, J. I. Jang, C. D. Brunetta, J. H. Zhang, M. N. Srnc, and J. A. Aitken, *Inorg. Chem.* 2014, 53, 7809.
8. S. C. Abrahams, and J. L. Bernstein, *J. Chem. Phys.* 1973, 59, 5415.



Table S4. The local dipole moments for the  $\text{CdS}_4$  and  $\text{SnS}_4$  tetrahedra, and the net dipole moment of a unit cell for  $\text{BaCdSnS}_4$ .

| $\text{BaCdSnS}_4$                 |                   |             |             |        |
|------------------------------------|-------------------|-------------|-------------|--------|
| Units                              | Dipole moment (D) |             |             |        |
|                                    | x-component       | y-component | z-component | debye  |
| $\text{Cd(1)S}_4$                  | 0.00              | 0.00        | -1.43       | 1.43   |
| $\text{Cd(2)S}_4$                  | 0.00              | 0.00        | -77.23      | 77.23  |
| $\text{Sn(1)S}_4$                  | 0.00              | 0.00        | 97.93       | 97.93  |
| $\text{Sn(2)S}_4$                  | 0.00              | 0.00        | 14.08       | 14.08  |
| Total $\text{CdS}_4$               | 0.00              | 0.00        | -78.66      | 78.66  |
| Total $\text{SnS}_4$               | 0.00              | 0.00        | 112.01      | 112.01 |
| Net dipole moment<br>(a unit cell) | 0.00              | 0.00        | 33.35       | 33.35  |

Figure S1. Powder X-ray diffraction patterns of  $\text{BaCdSnS}_4$  and  $\text{Ba}_3\text{CdSn}_2\text{S}_8$ .

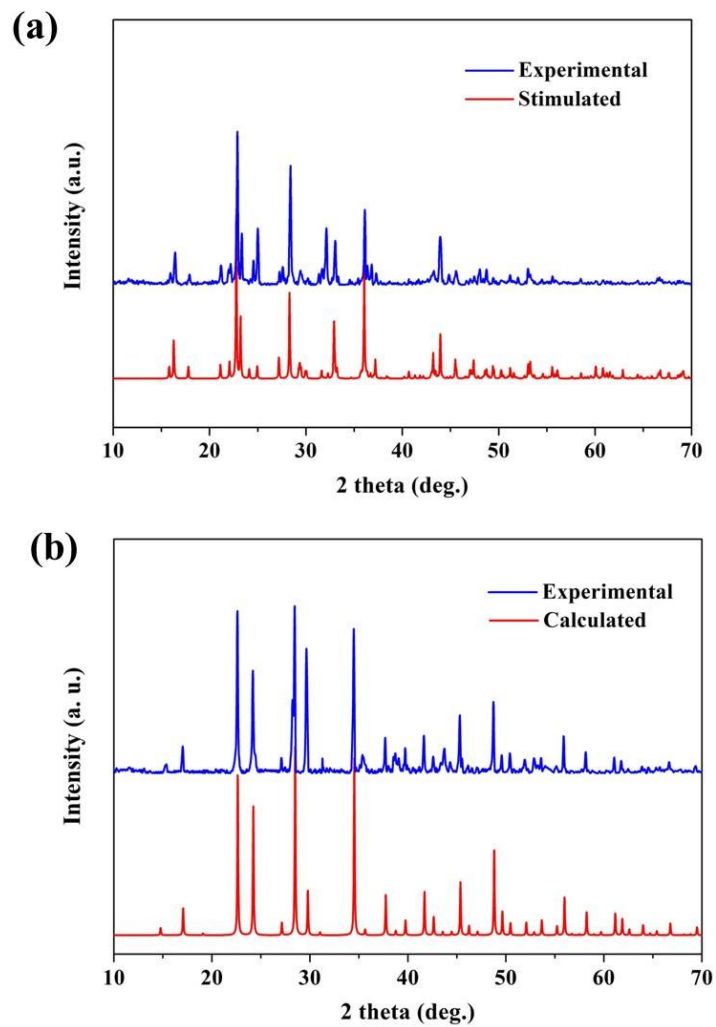

Figure S2. The  $\text{BaIn}_2\text{S}_4$  structure. (a) and (b)  $2\text{D } \infty[\text{In-S}]$  layers formed by the  $\text{InS}_4$  tetrahedra interweave with a 3D framework constituted by  $\text{BaS}_8$  polyhedra, the In-S bonds were omitted for the sake of clarity; (c)  $2\text{D } \infty[\text{In-S}]$  layer. (d) the  $\text{In}_2\text{S}_6$  dimer.

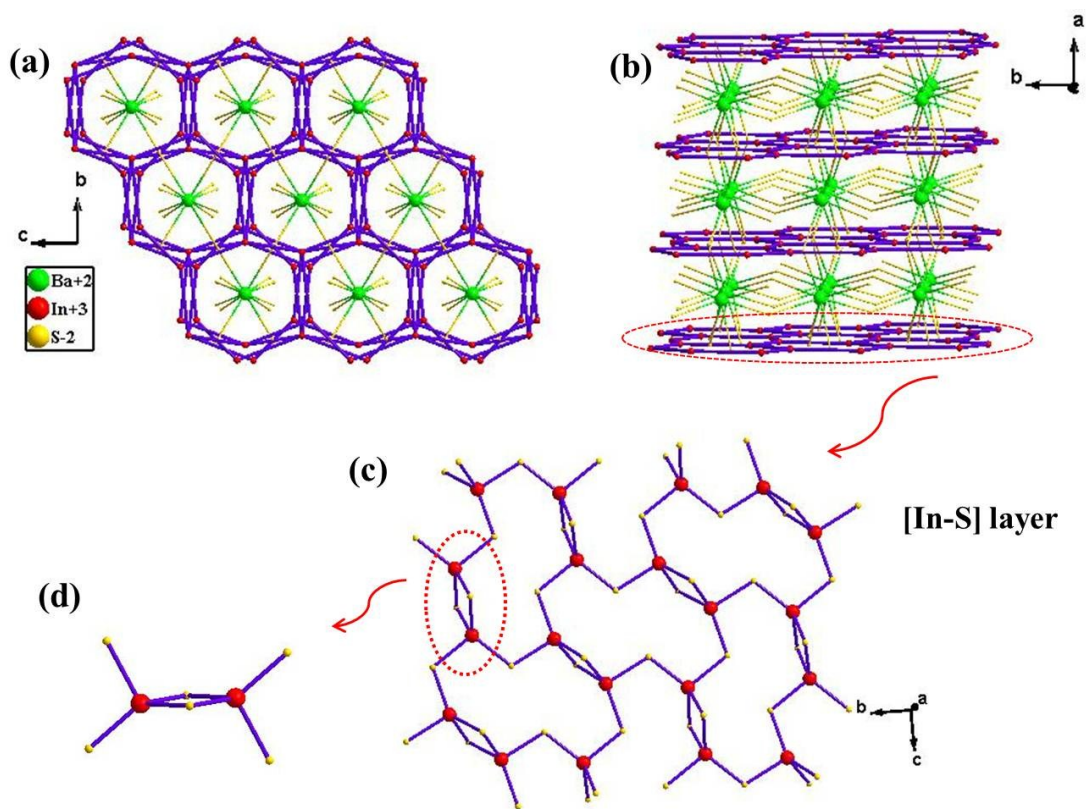

Figure S3. The 2D layers of  $\text{LiS}_4$  tetrahedra in the structure of  $\text{Li}_2\text{CdSnS}_4$ .

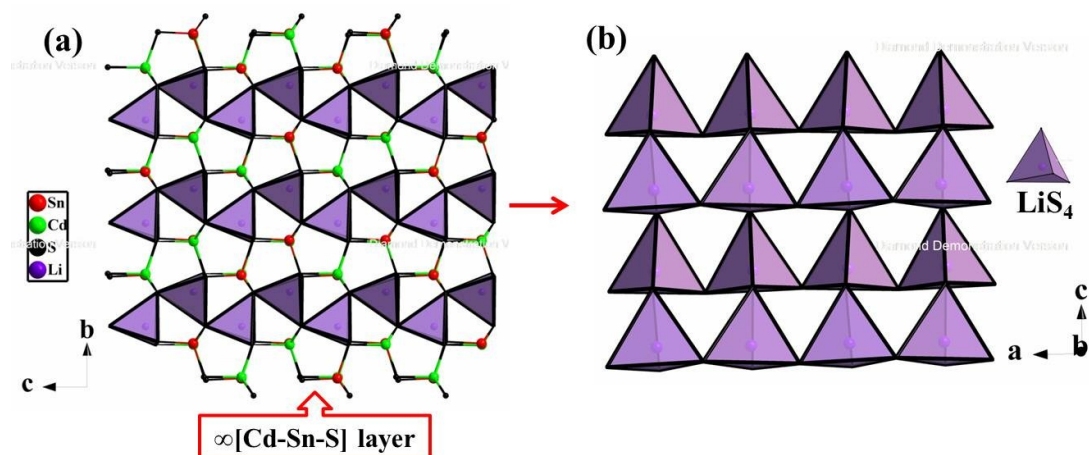

(a) 3D framework showing alternate stacking of the  $\text{LiS}_4$  and  $[\text{Cd-Sn-S}]$  tetrahedral layers; (b) the  $\text{LiS}_4$  tetrahedra connect with each other to build a 2D layer in the  $a$ - $c$  plane. The purple tetrahedra:  $\text{LiS}_4$  tetrahedron.

Figure S4. The 3D framework built by  $\text{BaS}_8$  polyhedra in the two structures  $\text{BaCdSnS}_4$  and  $\text{BaHgSnS}_4$ .

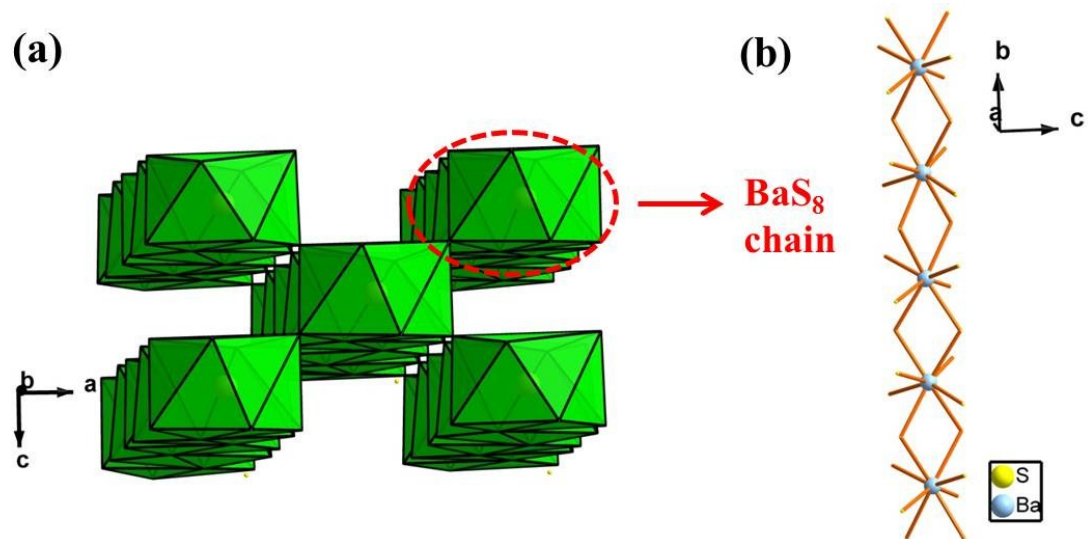

Figure S5. The different dihedral angles formed by edge-sharing of  $\text{CdS}_4/\text{HgS}_4$  and  $\text{SnS}_4$  tetrahedra in the structure of  $\text{BaCdSnS}_4$  (a) and  $\text{BaHgSnS}_4$  (b).

(a)

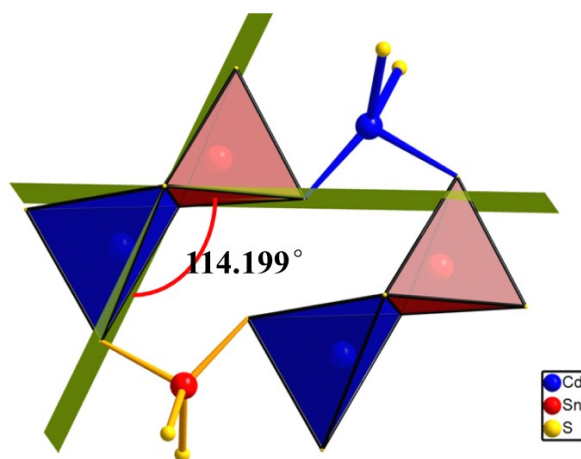

a dihedral angles  $114.199^\circ$  formed by edge-sharing of  $\text{CdS}_4$  and  $\text{SnS}_4$  tetrahedra in  $\text{BaCdSnS}_4$ , blue,  $\text{CdS}_4$ ; red,  $\text{SnS}_4$ .

(b)

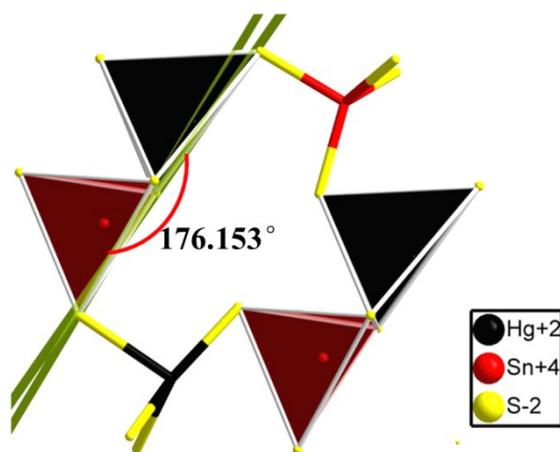

a dihedral angles  $176.153^\circ$  formed by edge-sharing of  $\text{HgS}_4$  and  $\text{SnS}_4$  tetrahedra in  $\text{BaHgSnS}_4$ , black,  $\text{HgS}_4$ ; red,  $\text{SnS}_4$ .

Figure S6. The  $\text{CdS}_4$  and  $\text{SnS}_4$  tetrahedra of  $\text{Ba}_3\text{CdSn}_2\text{S}_8$  are connected each other via corner-sharing (S1).

a

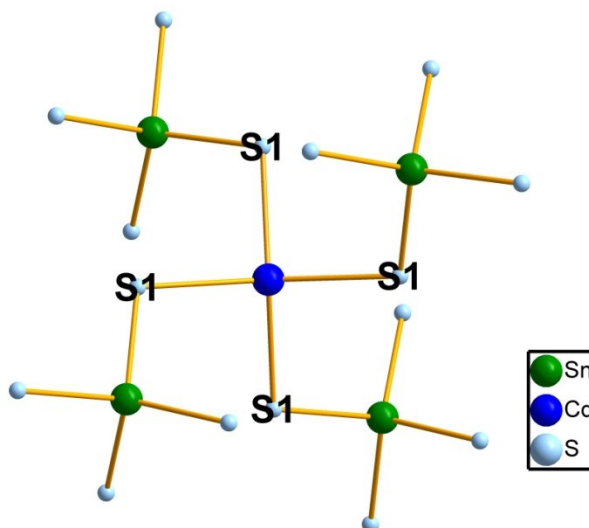

a b

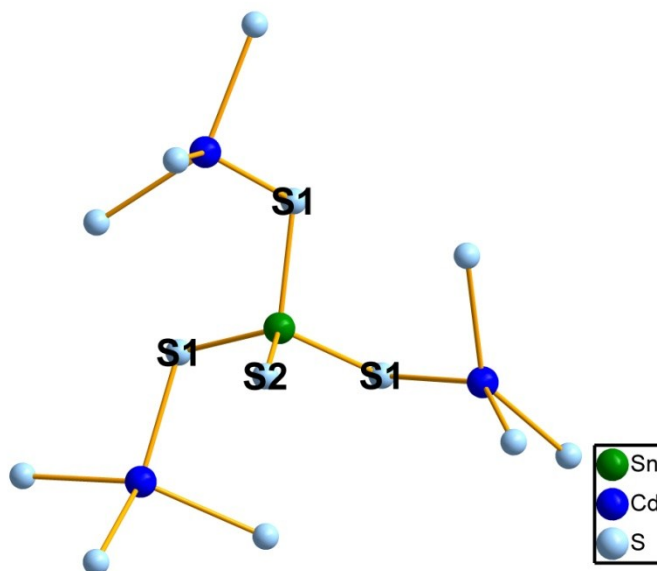

Figure S7. Mirror symmetry for the  $\text{CdS}_4$  tetrahedron in  $\text{Ba}_3\text{CdSn}_2\text{S}_8$ .

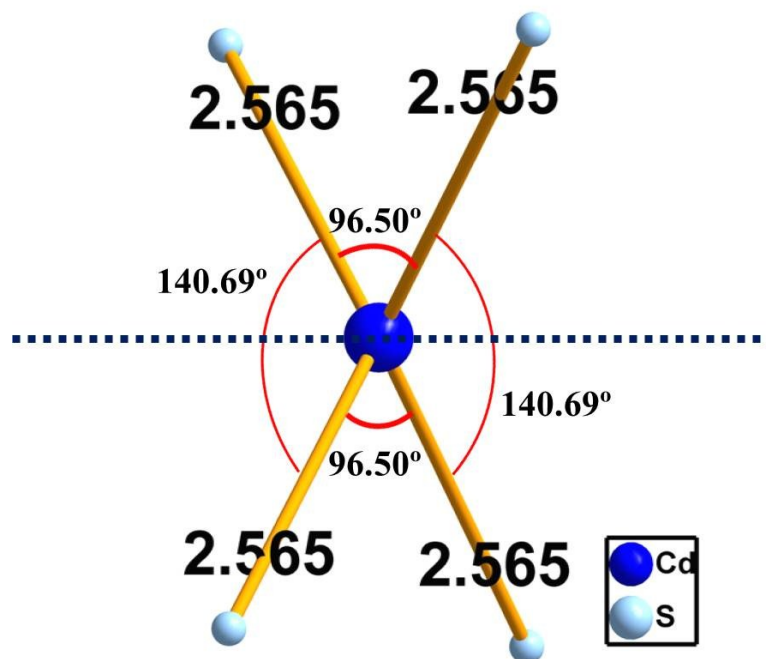



Figure S8. The  $\text{GeS}_4$  tetrahedra are arranged along the  $[111]$  direction in  $\text{Na}_{0.5}\text{Pb}_{1.75}\text{GeS}_4$ .

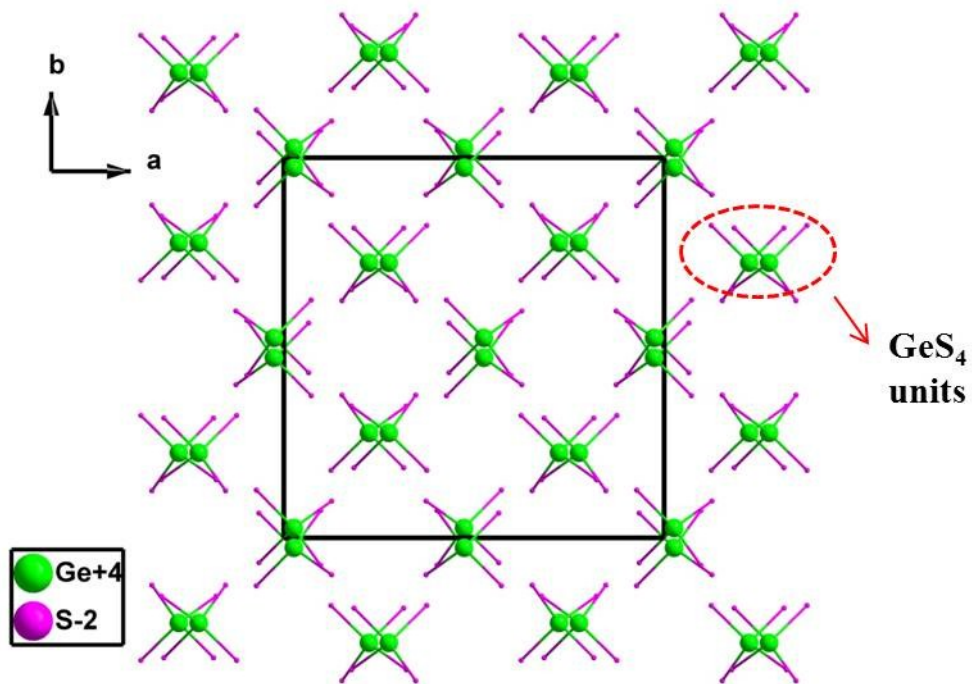

Figure S9. The IR spectra of  $\text{BaCdSnS}_4$  and  $\text{Ba}_3\text{CdSn}_2\text{S}_8$ .

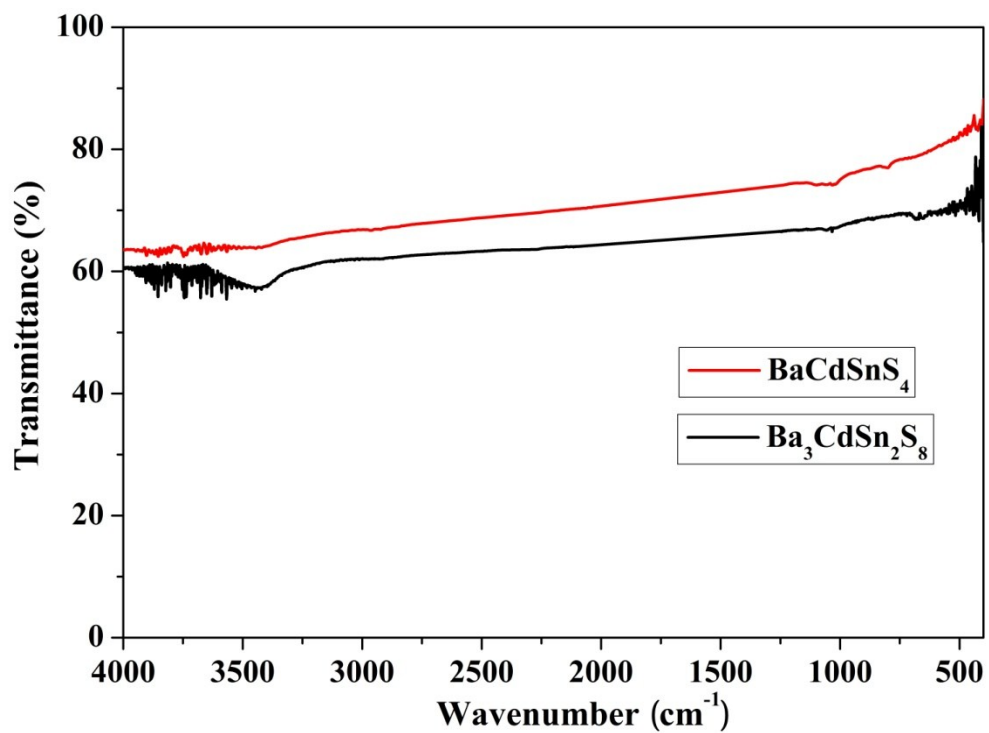

Figure S10. The SHG intensity as a function of particle size for  $\text{BaCdSnS}_4$  and  $\text{Ba}_3\text{CdSn}_2\text{S}_8$ ,  $\text{AgGaS}_2$  serves as the reference.

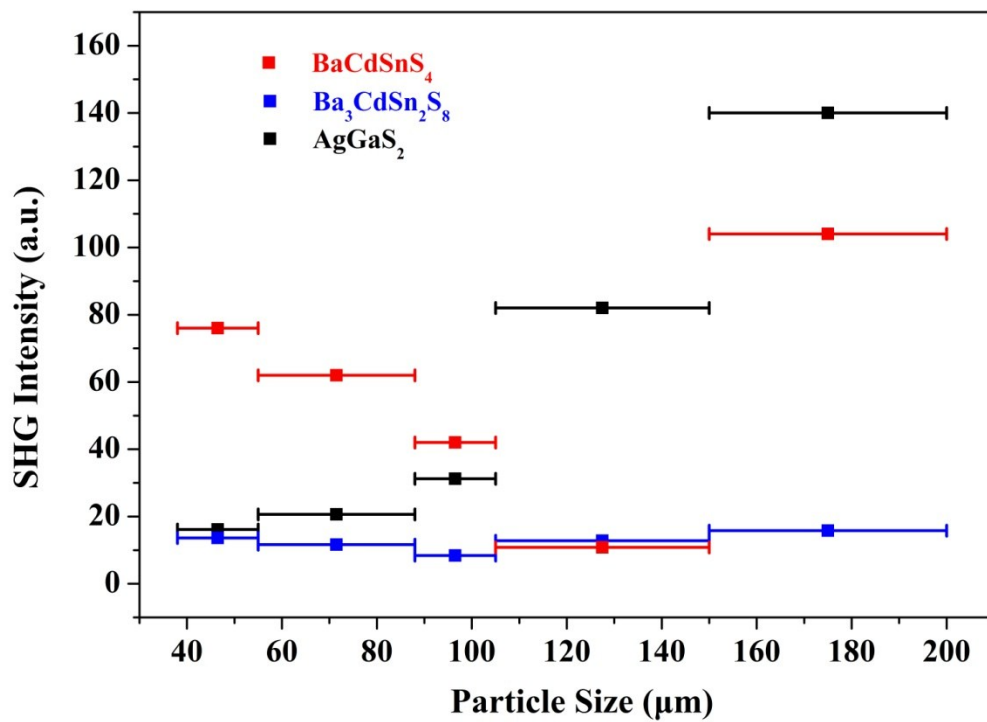

Figure S11. (a) Purple arrows represent the approximate direction of the local dipole moments and the net dipole moments for  $\text{CdS}_4$  tetrahedra. (b) Red arrows represent the approximate direction of the local dipole moments and the net dipole moments for  $\text{SnS}_4$  tetrahedra, respectively. The green arrow represents the direction of the net dipole moment for  $\text{BaCdSnS}_4$ .

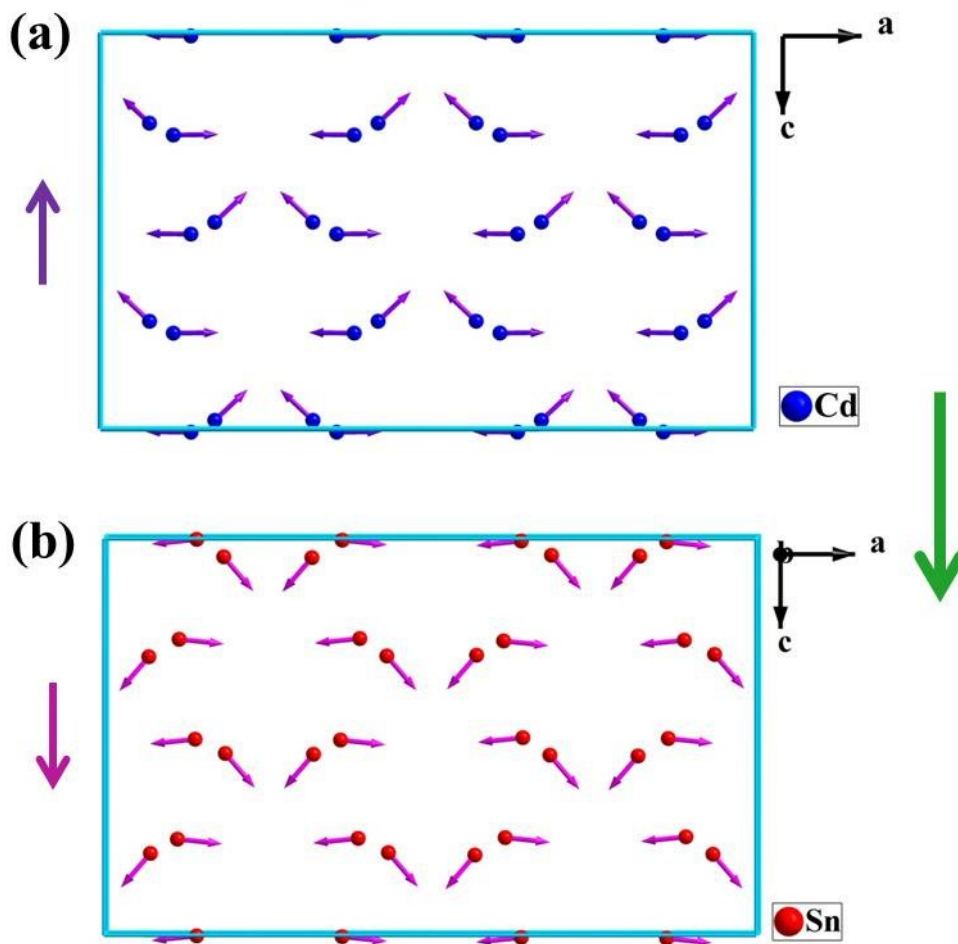

Supplement: c6dt01537a1.pdf [file c6dt01537a1.pdf]
